# Supplementary material for: MOF/TiO2 erythrocyte-like heterostructures decorated by noble metals for use in hydrogen photogeneration and pollutant photodegradation
Source: Royal Society of Chemistry journal article supplement (doi:10.1039/d3cy00531c), 2023-01-01
Supplement: d3cy00531c1.pdf [file d3cy00531c1.pdf]

## SUPPLEMENTARY INFORMATION

### **MOF/TiO<sub>2</sub> erythrocyte-like heterostructures decorated by noble metals for use in hydrogen photogeneration and pollutant photodegradation**

*Mateusz A. Baluk<sup>1\*</sup>, Paweł Mazierski<sup>1</sup>, Aleksandra Pieczyńska<sup>1</sup>, Kostiantyn Nikiforow<sup>2</sup>, Grzegorz Trykowski<sup>3</sup>,  
Tomasz Klimczuk<sup>4</sup>, Adriana Zaleska-Medynska<sup>1\*</sup>*

<sup>1</sup>Department of Environmental Technology, Faculty of Chemistry, University of Gdansk, Wita Stwosza 63, 80-308 Gdansk, Poland

<sup>2</sup>Institute of Physical Chemistry, Polish Academy of Science, Kasprzaka 44/52, 01-224 Warsaw, Poland

<sup>3</sup>Faculty of Chemistry, Nicolaus Copernicus University, Torun 87-100, Poland

<sup>4</sup>Department of Solid State Physics, Faculty of Applied Physics and Mathematics, Gdansk University of Technology, 80-233 Gdansk, Poland

\*Adriana Zaleska-Medynska: [adriana.zaleska-medynska@ug.edu.pl](mailto:adriana.zaleska-medynska@ug.edu.pl)

\*Mateusz A. Baluk: [mateusz.baluk@phdstud.ug.edu.pl](mailto:mateusz.baluk@phdstud.ug.edu.pl)

**Table S1.** Particle size analysis of MOFs, h-MOFs, and ch-MOFs and the resulting noble metal nanoparticles (average of 100 counts).

| Sample         | Size of particles (nm)                                  | Size of noble metal nanoparticles (nm) |
|----------------|---------------------------------------------------------|----------------------------------------|
| MOFs           | width: $738.4 \pm 235.9$                                | -                                      |
| MOFs/Au        | thickness: $160.3 \pm 24.4$                             | $47.0 \pm 6.5$                         |
| h-MOFs         | width: $998.6 \pm 241.6$<br>thickness: $187.2 \pm 42.7$ | -                                      |
| h-MOFs/Au      |                                                         | $98.3 \pm 54.6$                        |
| h-MOFs/Au0.5%  |                                                         | $85.3 \pm 37.3$                        |
| h-MOFs/Au2.0%  |                                                         | $108.8 \pm 32.6$                       |
| h-MOFs/Ag      |                                                         | $38.7 \pm 8.3$                         |
| h-MOFs/Pt      |                                                         | $26.6 \pm 7.1$                         |
| h-MOFs/Pd      |                                                         | $113 \pm 51.1$                         |
| h-MOFs (total) |                                                         | irregular                              |
| ch-MOFs        | width: $393.2 \pm 115.5$<br>thickness: $94.5 \pm 17.9$  | -                                      |
| ch-MOFs/Au     |                                                         | $33.8 \pm 12.1$                        |
| ch-MOFs/Ag     |                                                         | $29.9 \pm 7.7$                         |
| ch-MOFs/Pt     |                                                         | $41.9 \pm 12.2$                        |
| ch-MOFs/Pd     |                                                         | $34.6 \pm 15.7$                        |

**Table S2.** Determination of the chemical composition of h-MOFs and h-MOFs/Au by TEM/EDX analysis.

| Area (sample)      | Weight composition (%)                               | Atomic composition (%)                             |
|--------------------|------------------------------------------------------|----------------------------------------------------|
| Area 1 (h-MOFs)    | C 62.36%, N 5.92%<br>O 17.94%, Ti 13.76%             | C 73.92%, N 6.01%<br>O 15.96%, Ti 4.09%            |
| Area 2 (h-MOFs)    | C 62.53%, N 6.40%<br>O 16.74%, Ti 13.31%             | C 74.80%, N 6.46%<br>O 14.80%, Ti 3.93%            |
| Area 3 (h-MOFs)    | C 59.07%, N 6.39%<br>O 22.67%, Ti 11.85%             | C 69.86%, N 6.48%<br>O 20.13%, Ti 3.51%            |
| Area 4 (h-MOFs)    | C 55.71%, N 2.97%<br>O 11.20%, Ti 30.07%             | C 75.06%, N 3.44%<br>O 11.33%, Ti 10.16%           |
| Area 5 (h-MOFs/Au) | C 35.73%, N 1.71%<br>O 5.19%, Ti 15.79%<br>Au 41.56% | C 75.07%, N 3.08%<br>O 8.19%, Ti 8.31%<br>Au 5.32% |

**Table S3.** Results of the XPS analysis of the MOF and h-MOF samples.

|                                 | MOFs                 |                       | h-MOFs              |                       |
|---------------------------------|----------------------|-----------------------|---------------------|-----------------------|
|                                 | Position,<br>eV B.E. | Concentration,<br>%At | Position<br>eV B.E. | Concentration,<br>%At |
| <b>O 1s a (Ti-O)</b>            | 530.22               | <b>9.18</b>           | 530.54              | <b>1.42</b>           |
| <b>O 1s b (C=O)</b>             | 531.78               | <b>19.29</b>          | 531.85              | <b>15.29</b>          |
| <b>O 1s c (-OH)</b>             | 532.61               | <b>3.36</b>           | 533.59              | <b>18.4</b>           |
|                                 |                      | <b>31.83</b>          |                     | <b>35.11</b>          |
| <b>Ti 2p a</b>                  | 458.88               | <b>6</b>              | 458.6               | <b>1.45</b>           |
| <b>Ti 2p b</b>                  | 457.35               | <b>0.36</b>           | 459.72              | <b>0.9</b>            |
|                                 |                      | <b>6.36</b>           |                     | <b>2.35</b>           |
| <b>N 1s a (-NH<sub>2</sub>)</b> | 399.57               | <b>5.09</b>           | 399.11              | <b>0.11</b>           |
| <b>N 1s b (res. DMF)</b>        | 401.05               | <b>1.04</b>           | 401.03              | <b>0.27</b>           |
| <b>N 1s c (-NH<sup>+</sup>)</b> | 402.93               | <b>1.21</b>           | 402.98              | <b>1.31</b>           |
|                                 |                      | <b>7.34</b>           |                     | <b>1.69</b>           |
| <b>C 1s a (C-C)</b>             | 284.8                | <b>28.25</b>          | 284.8               | <b>19.25</b>          |
| <b>C 1s b (C-O)</b>             | 286.2                | <b>9.1</b>            | 286.15              | <b>16.73</b>          |
| <b>C 1s c (C-N, C=O)</b>        | 286.96               | <b>5.93</b>           | 286.9               | <b>14.41</b>          |
| <b>C 1s d (COOH)</b>            | 288.76               | <b>10.41</b>          | 288.88              | <b>6.61</b>           |
| <b>C 1s e (Pi electrons)</b>    | 290.7                | <b>0.79</b>           | 291                 | <b>3.85</b>           |
|                                 |                      | <b>54.48</b>          |                     | <b>60.85</b>          |

**Table S4.** Results of the XPS analysis of the ch-MOF sample.

|                              | ch-MOFs              |                              |
|------------------------------|----------------------|------------------------------|
|                              | Position, eV<br>B.E. | Concentration,<br>%At        |
| <b>O 1s a (Ti-O)</b>         | 529.98               | <b>55.03</b>                 |
| <b>O 1s b (Ti-O<br/>vac)</b> | 530.97               | <b>5.64</b>                  |
| <b>O 1s c (C=O)</b>          | 532.01               | <b>2.73</b><br><b>63.4</b>   |
| <b>Ti 2p</b>                 | 458.73               | <b>25.33</b><br><b>25.33</b> |
| <b>N 1s</b>                  | 400.4                | <b>0.46</b><br><b>0.46</b>   |
| <b>C 1s a (C-C)</b>          | 284.8                | <b>8.15</b>                  |
| <b>C 1s b (C-O)</b>          | 286.42               | <b>1.19</b>                  |
| <b>C 1s d (COOH)</b>         | 289.06               | <b>1.47</b><br><b>10.81</b>  |

**Table S5.** Results of the XPS analysis of the h-MOF/M samples.

|                                              | h-MOF/Au           |                       | h-MOF/Ag           |                       | h-MOF/Pd           |                       | h-MOF/Pt           |                       |
|----------------------------------------------|--------------------|-----------------------|--------------------|-----------------------|--------------------|-----------------------|--------------------|-----------------------|
|                                              | Position,<br>eV BE | Concentration,<br>%at |
| <b>O 1s a (Me-O)</b>                         | 530.56             | <b>1.12</b>           | 530.44             | <b>0.91</b>           | 530.49             | <b>1.05</b>           | 530.67             | <b>1.78</b>           |
| <b>O 1s b (C=O)</b>                          | 531.93             | <b>15.68</b>          | 531.89             | <b>15.7</b>           | 531.9              | <b>15.3</b>           | 531.89             | <b>15.38</b>          |
| <b>O 1s c (C-O)</b>                          | 533.63             | <b>18.64</b>          | 533.62             | <b>18.48</b>          | 533.57             | <b>18.02</b>          | 533.59             | <b>17.77</b>          |
| <b>O</b>                                     |                    | <b>35.44</b>          |                    | <b>35.09</b>          |                    | <b>34.37</b>          |                    | <b>34.93</b>          |
| <b>Ti 2p a (Ti<sub>2</sub>O<sub>3</sub>)</b> | 458.57             | <b>1.35</b>           | 458.52             | <b>1.29</b>           | 458.59             | <b>1.44</b>           | 458.61             | <b>1.42</b>           |
| <b>Ti 2p b (TiO<sub>2</sub>)</b>             | 459.85             | <b>0.64</b>           | 459.82             | <b>0.63</b>           | 459.96             | <b>0.67</b>           | 459.74             | <b>0.87</b>           |
| <b>Ti</b>                                    |                    | <b>1.99</b>           |                    | <b>1.92</b>           |                    | <b>2.11</b>           |                    | <b>2.29</b>           |
| <b>N 1s a (C-N)</b>                          |                    |                       | 399.78             | <b>0.1</b>            |                    |                       |                    |                       |
| <b>N 1s b (res. DMF)</b>                     | 400.92             | <b>0.33</b>           | 401.4              | <b>0.15</b>           | 400.93             | <b>0.37</b>           | 400.57             | <b>0.2</b>            |
| <b>N 1s b (-NH<sup>+</sup>)</b>              | 402.99             | <b>1.19</b>           | 403.03             | <b>0.98</b>           | 402.93             | <b>1.03</b>           | 402.87             | <b>0.9</b>            |
| <b>N</b>                                     |                    | <b>1.52</b>           |                    | <b>1.23</b>           |                    | <b>1.4</b>            |                    | <b>1.1</b>            |
| <b>C 1s a (C-C)</b>                          | 284.8              | <b>21.1</b>           | 284.78             | <b>20.26</b>          | 284.78             | <b>22.29</b>          | 284.8              | <b>22.25</b>          |
| <b>C 1s b (C-O)</b>                          | 286.17             | <b>15.82</b>          | 286.13             | <b>16.13</b>          | 286.21             | <b>17.57</b>          | 286.23             | <b>18.45</b>          |
| <b>C 1s c (C-N,<br/>C=O)</b>                 | 286.89             | <b>14.3</b>           | 286.88             | <b>13.65</b>          | 286.88             | <b>12.14</b>          | 286.89             | <b>9.27</b>           |
| <b>C 1s d (COOH)</b>                         | 288.9              | <b>6.65</b>           | 288.84             | <b>6.28</b>           | 288.88             | <b>6.89</b>           | 288.85             | <b>6.33</b>           |
| <b>C 1s e (pi<br/>electrons)</b>             | 291.21             | <b>3.13</b>           | 290.89             | <b>5.09</b>           | 291.13             | <b>3.22</b>           | 290.67             | <b>3.97</b>           |
| <b>C</b>                                     |                    | <b>61</b>             |                    | <b>61.41</b>          |                    | <b>62.11</b>          | 293.45             | <b>1.41</b>           |
| <b>Metal</b>                                 | 85.1               | <b>0.03</b>           | 369.01             | <b>0.33</b>           | 338.19             | <b>0.02</b>           |                    | <b>0</b>              |
|                                              |                    | <b>0.03</b>           |                    | <b>0.33</b>           |                    | <b>0.02</b>           |                    | <b>0</b>              |

Au 4f

Ag 3d

Pd 3d

Pt 4f

**Table S6.** Results of the XPS analysis of the ch-MOF/M samples.

|                                  | ch-MOF/Au          |                       | ch-MOF/Ag          |                       | ch-MOF/Pd          |                       | ch-MOF/Pt          |                       |
|----------------------------------|--------------------|-----------------------|--------------------|-----------------------|--------------------|-----------------------|--------------------|-----------------------|
|                                  | Position,<br>eV BE | Concentration,<br>%at |
| <b>O 1s a (Me-O)</b>             | 530.01             | <b>55.62</b>          | 529.74             | <b>44.58</b>          | 529.92             | <b>48.58</b>          | 529.82             | <b>50.8</b>           |
| <b>O 1s a (Me-O<br/>vacancy)</b> |                    |                       | 530.55             | <b>6.25</b>           | 530.8              | <b>4.99</b>           | 530.84             | <b>6.17</b>           |
| <b>O 1s b (C=O)</b>              | 531.31             | <b>4.58</b>           | 531.64             | <b>3.19</b>           | 531.82             | <b>3.59</b>           | 531.89             | <b>3.51</b>           |
| <b>O 1s c (C-O)</b>              | 532.46             | <b>2.41</b>           | 532.56             | <b>1.16</b>           | 532.83             | <b>0.95</b>           |                    |                       |
| <b>O</b>                         |                    | <b>62.61</b>          |                    | <b>55.18</b>          |                    | <b>58.11</b>          |                    | <b>60.48</b>          |
| <b>Ti 2p (TiO<sub>2</sub>)</b>   | 458.74             | <b>24.08</b>          | 458.51             | <b>21.85</b>          | 458.68             | <b>22.51</b>          | 458.57             | <b>23.07</b>          |
| <b>Ti</b>                        |                    | <b>24.08</b>          |                    | <b>21.85</b>          |                    | <b>22.51</b>          |                    | <b>23.07</b>          |
| <b>N 1s a (C-N)</b>              | 400.22             | <b>1.27</b>           | 400.42             | <b>1.08</b>           | 400.35             | <b>0.91</b>           | 400.12             | <b>0.82</b>           |
| <b>N</b>                         |                    | <b>1.27</b>           |                    | <b>1.08</b>           |                    | <b>0.91</b>           |                    | <b>0.82</b>           |
| <b>C 1s a (C-C)</b>              | 284.83             | <b>7.74</b>           | 284.8              | <b>14.88</b>          | 284.84             | <b>14.22</b>          | 284.8              | <b>10.53</b>          |
| <b>C 1s b (C-O)</b>              | 286.15             | <b>2.81</b>           | 286.27             | <b>3.63</b>           | 286.25             | <b>2.4</b>            | 286.19             | <b>3.29</b>           |
| <b>C 1s c (C-N, C=O)</b>         |                    |                       | 288.41             | <b>0.97</b>           | 288.04             | <b>0.66</b>           |                    |                       |
| <b>C 1s d (COOH)</b>             | 288.99             | <b>1.33</b>           | 289.27             | <b>1.63</b>           | 289.11             | <b>1.05</b>           | 288.67             | <b>1.61</b>           |
| <b>C</b>                         |                    | <b>11.88</b>          |                    | <b>21.11</b>          |                    | <b>18.33</b>          |                    | <b>15.43</b>          |
| <b>Metal</b>                     | 83.29              | <b>0.16</b>           | 367.36             | <b>0.62</b>           | 340.24             | <b>0.08</b>           | 70.26              | <b>0.19</b>           |
|                                  |                    |                       | 368.06             | <b>0.17</b>           | 342.01             | <b>0.06</b>           | 72.9               | <b>0.02</b>           |
|                                  |                    | <b>0.16</b>           |                    | <b>0.79</b>           |                    | <b>0.14</b>           |                    | <b>0.21</b>           |
|                                  | Au 4f              |                       | Ag 3d              |                       | Pd 3d              |                       | Pt 4f              |                       |

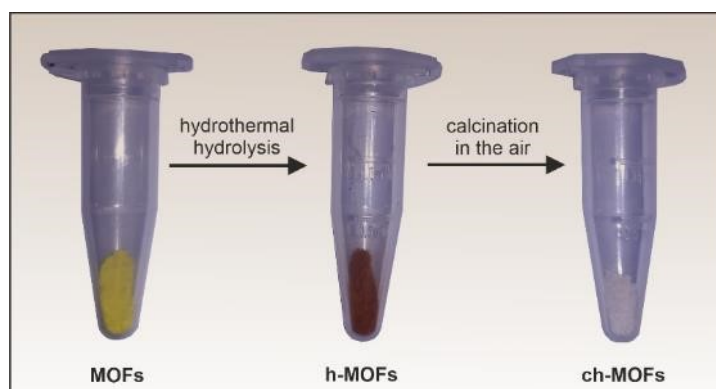

**Fig. S1.** Images of the samples obtained (from right to left: MOFs, h-MOFs, and ch-MOFs).



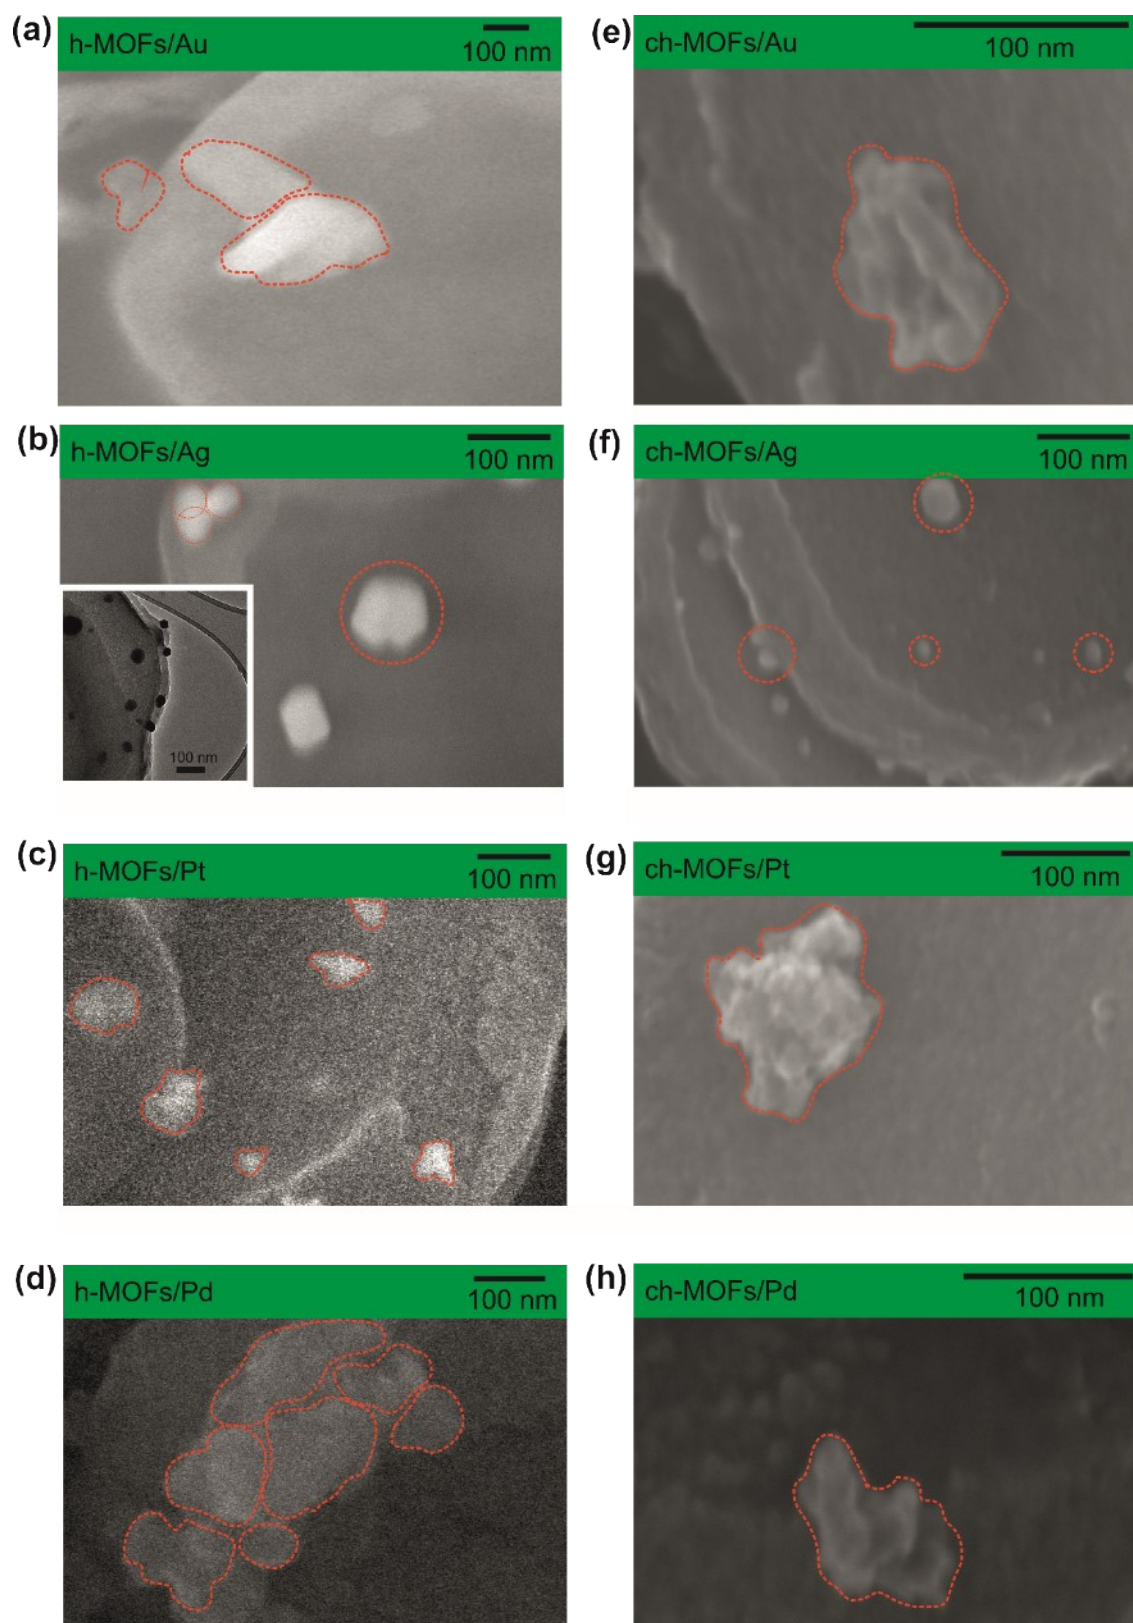

**Fig. S2.** SEM images of (a) h-MOFs/Au; (b) h-MOFs/Ag (with TEM image as inswert); (c) h-MOFs/Pt; (d) h-MOFs/Pd; (e) ch-MOFs/Au; (f) ch-MOFs/Ag; (g) ch-MOFs/Pt; (h) ch-MOFs/Pd

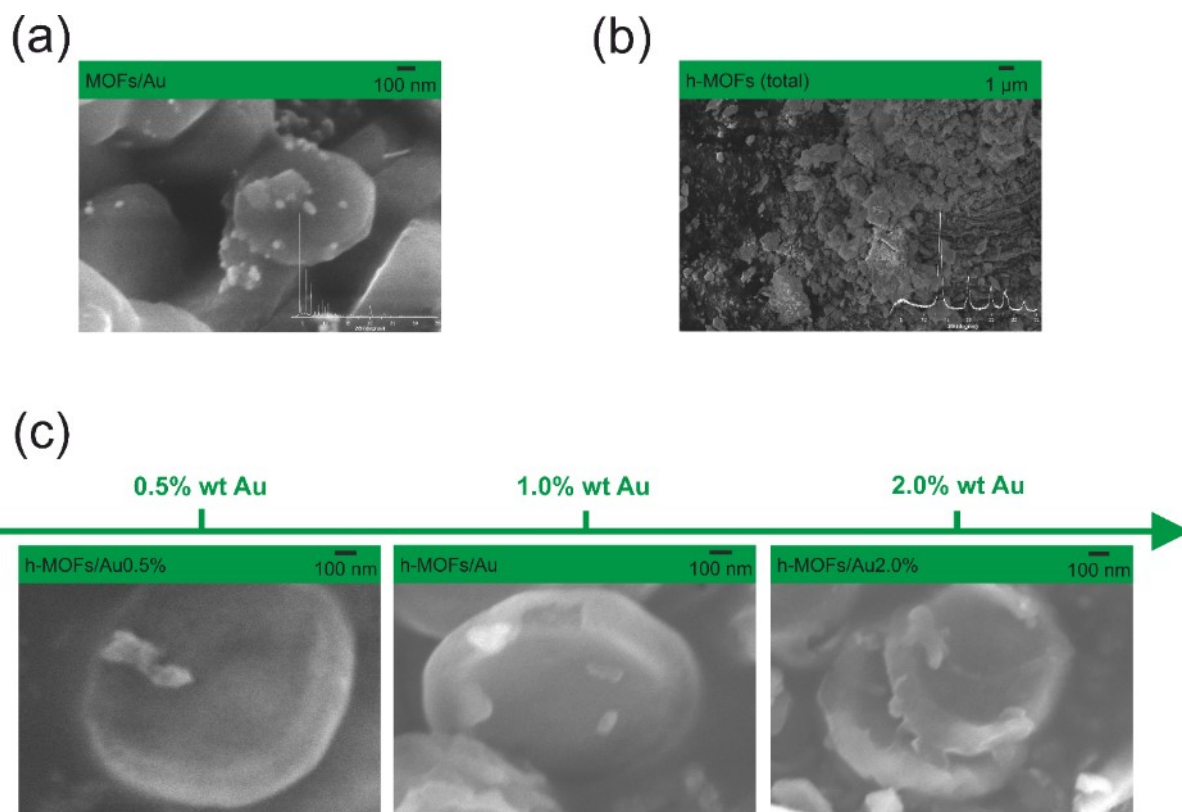

**Fig. S3.** SEM image of (a) MOFs/Au with XRD analysis as insert, (b) h-MOFs (total) with XRD analysis; and (c) h-MOF modifications with different amounts of Au (0.5, 1.0, and 2.0 wt%).

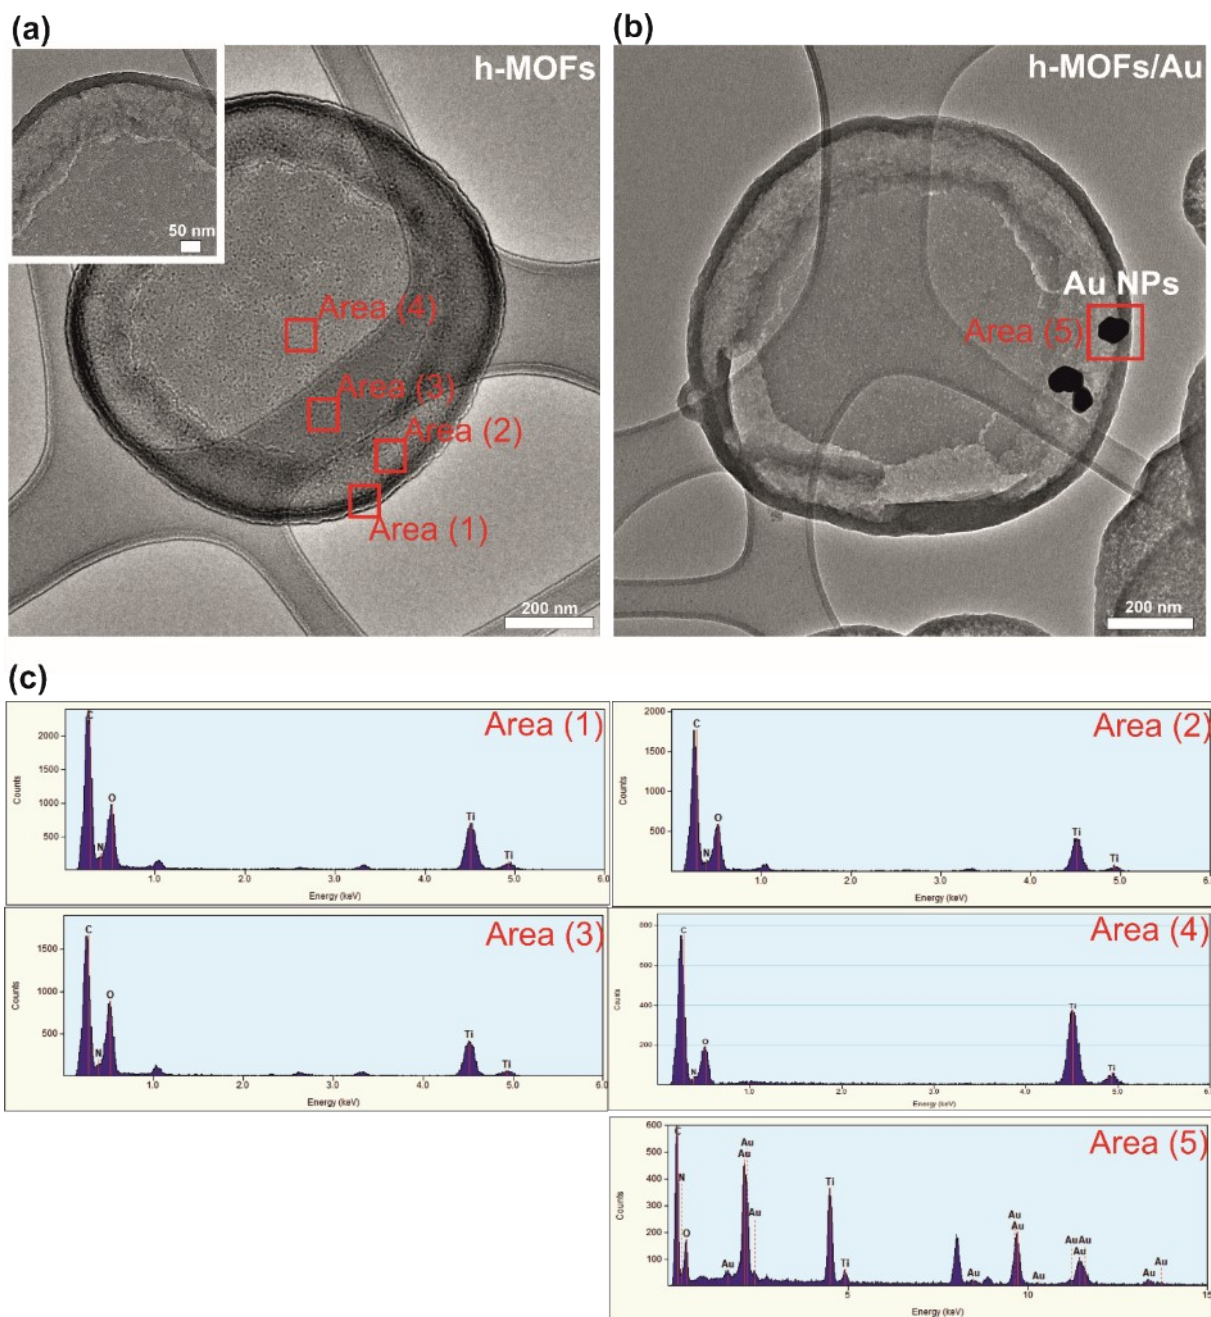

**Fig. S4.** TEM image of (a) h-MOFs and (b) h-MOFs/Au with (c) the corresponding EDS spectra.

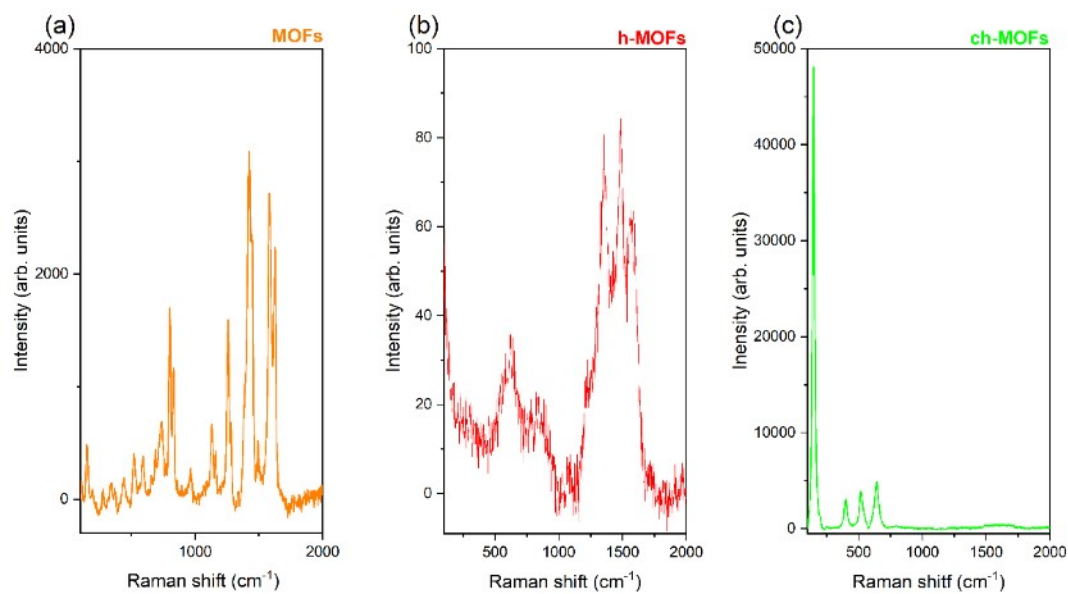

**Fig. S5.** Raman spectrum of MOF, h-MOF, and ch-MOF samples in the range of 100–2000  $\text{cm}^{-1}$

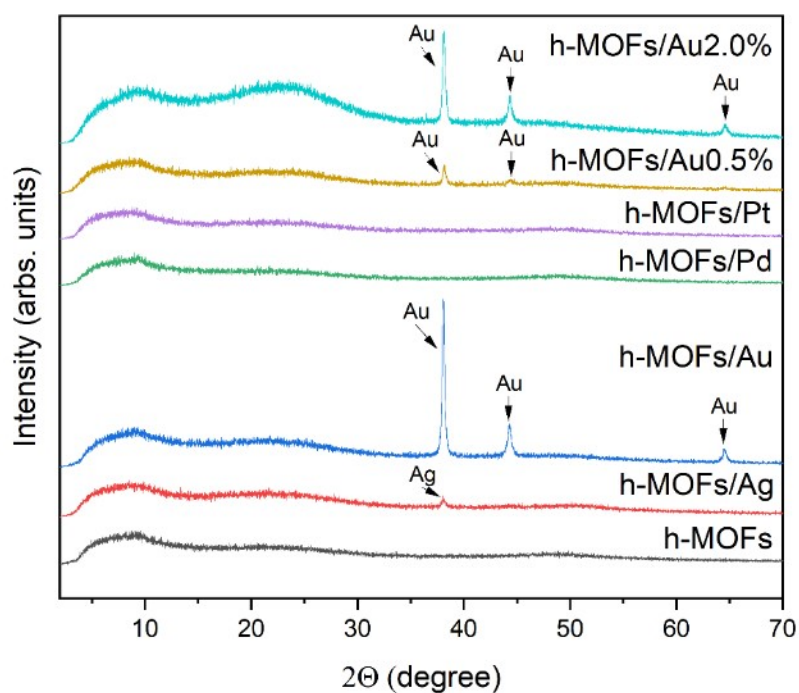

**Fig. S6.** XRD analysis for h-MOFs and modified samples in the range of 2–70° at  $2\theta$  (degree).

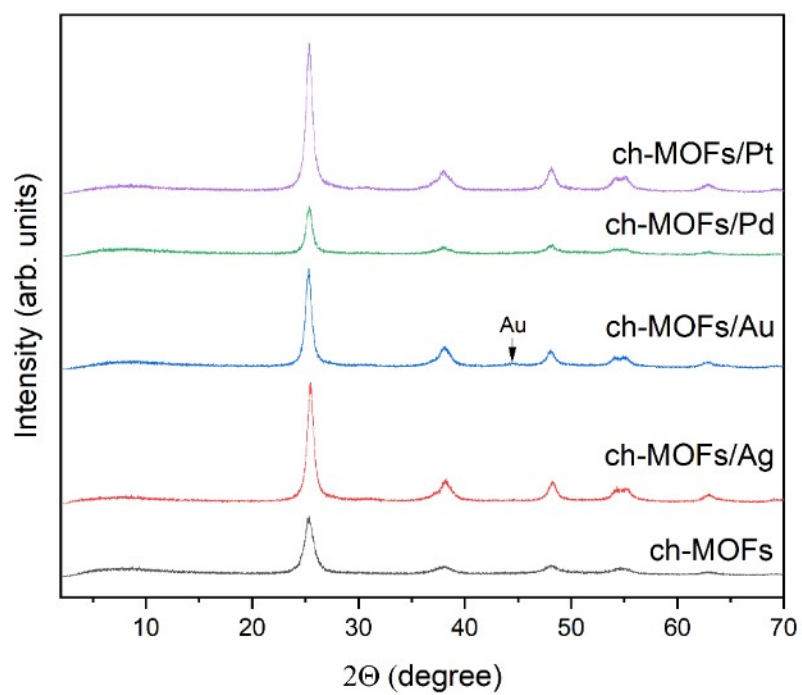

**Fig. S7.** XRD analysis for ch-MOFs and modified samples in the range of 2–70° at 2θ (degree).

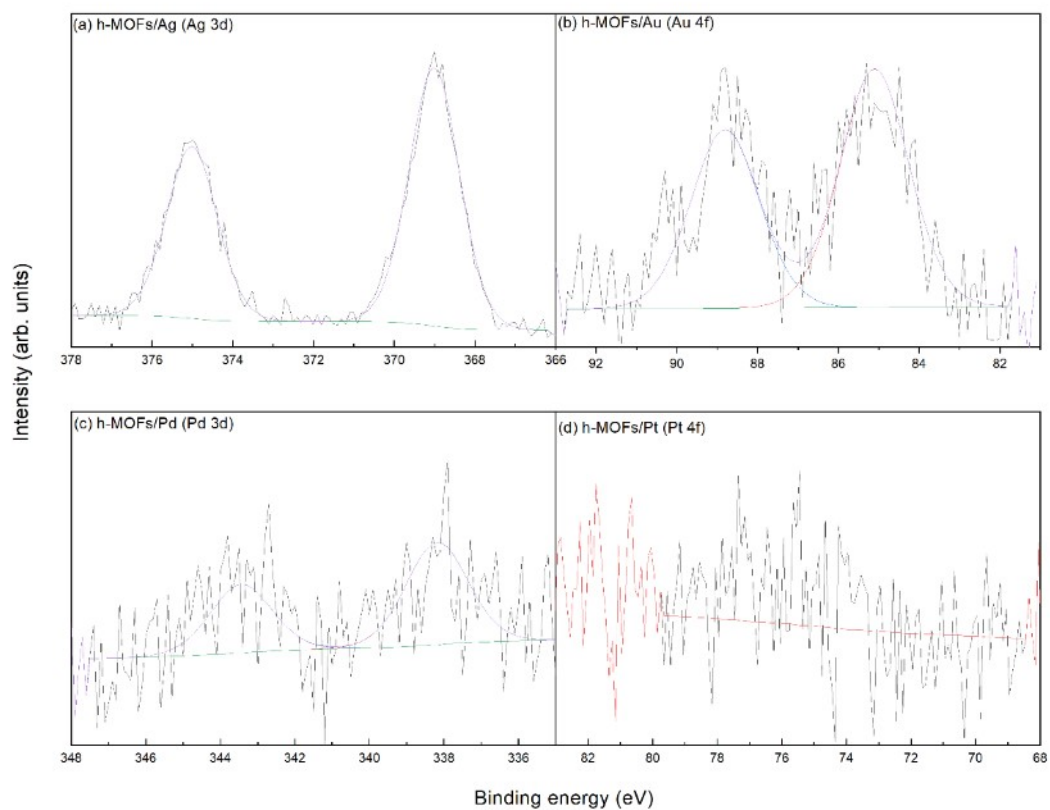

**Fig. S8.** High resolution spectra of the metals in the h-MOF/M samples: Ag 3d (a), Au 4f (b), P 3d (c), and Pt 4f (d).

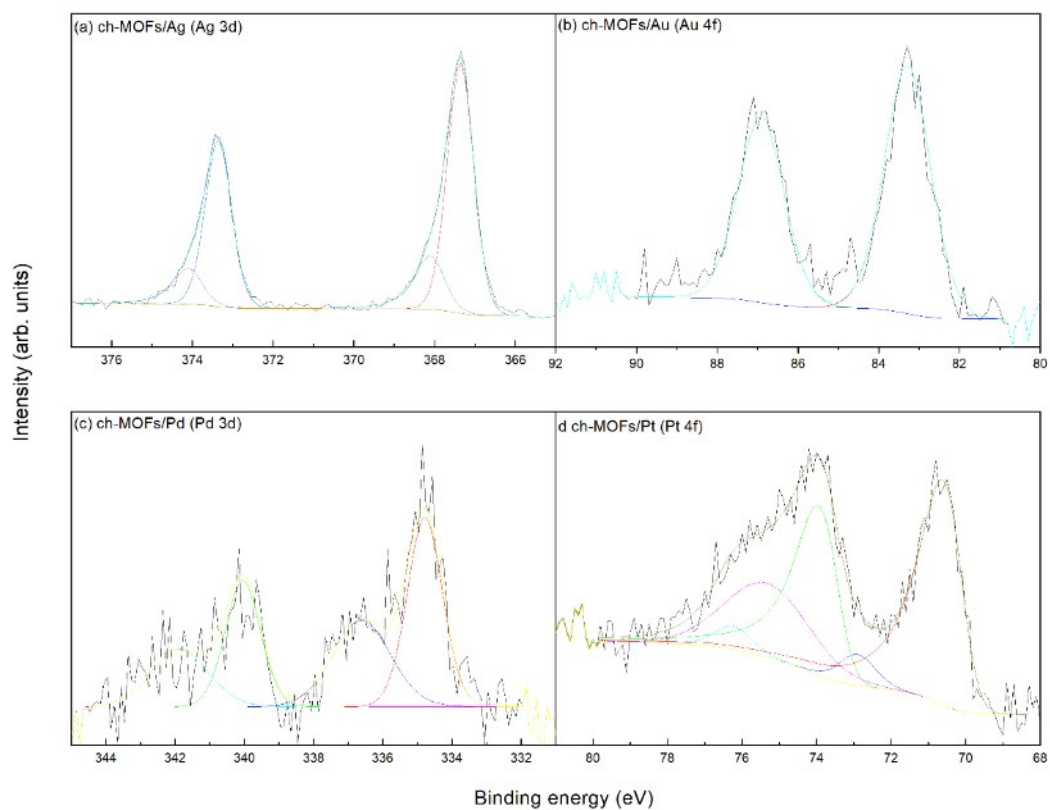

**Fig. S9.** High resolution spectra of the metals in the ch-MOF/M samples: Ag 3d (a), Au 4f (b), P 3d (c), and Pt 4f (d)

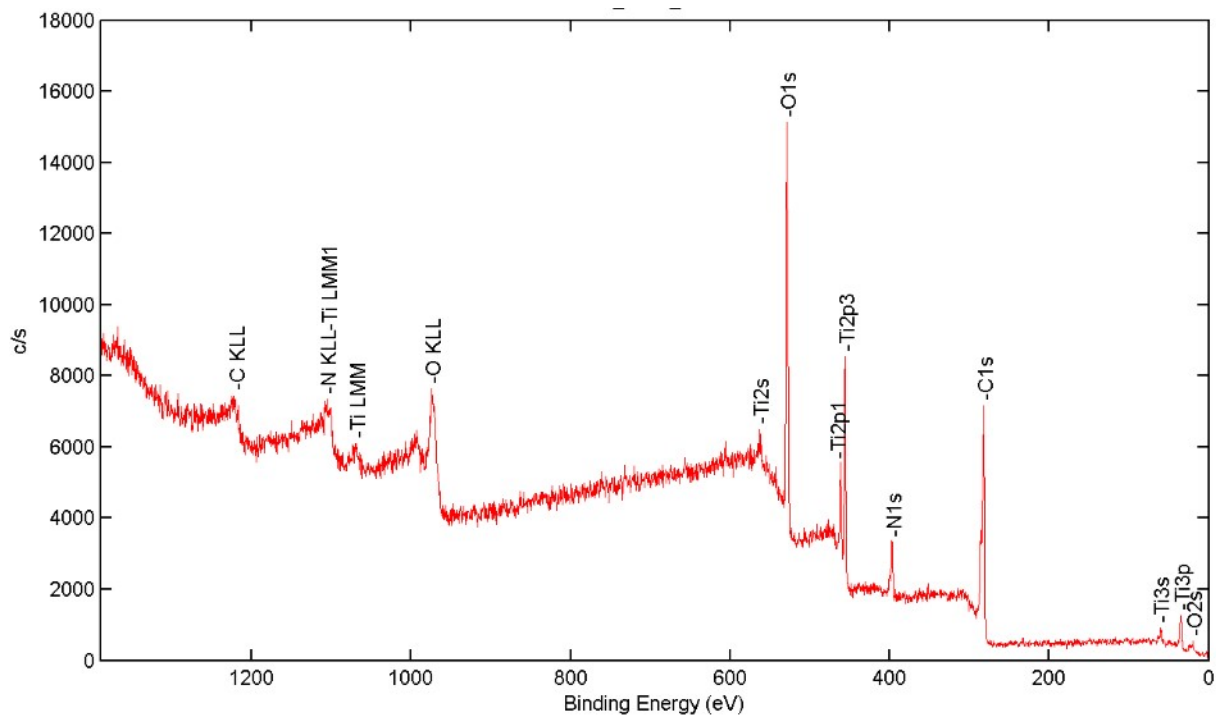

**Fig. S10.** XPS survey spectrum for a MOF sample.



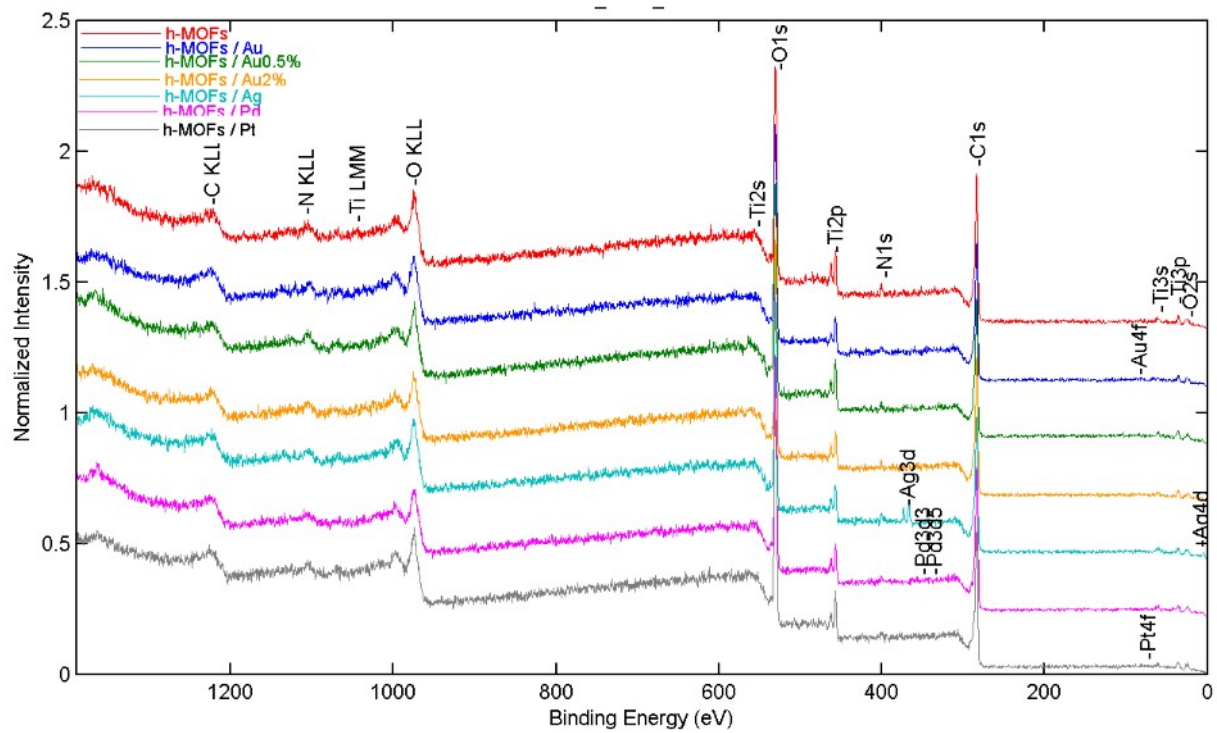

**Fig. S11.** XPS survey spectrum for h-MOF samples.

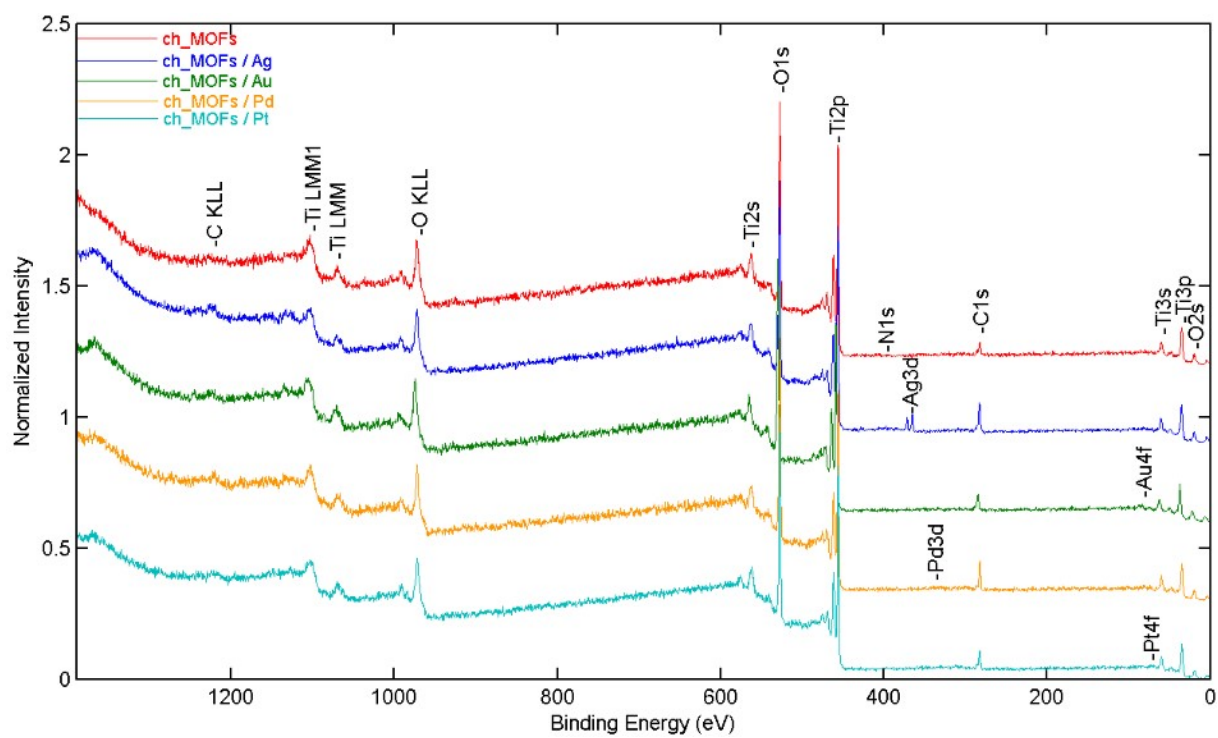

**Fig. S12.** XPS survey spectrum for ch-MOF samples.

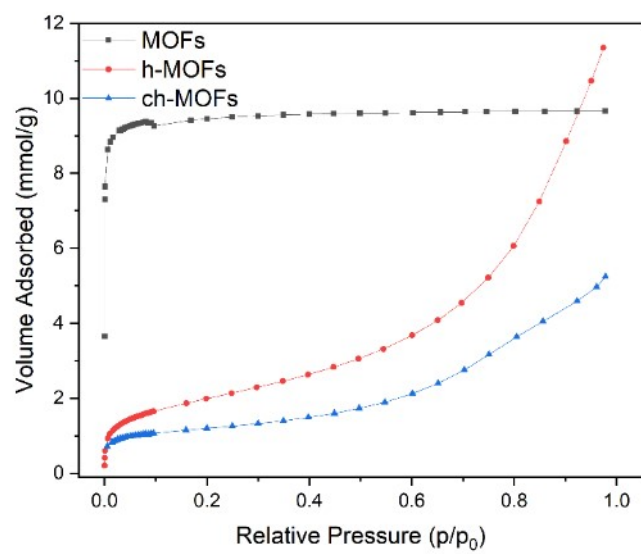

**Fig. S13.** Nitrogen adsorption BET isotherm of samples.

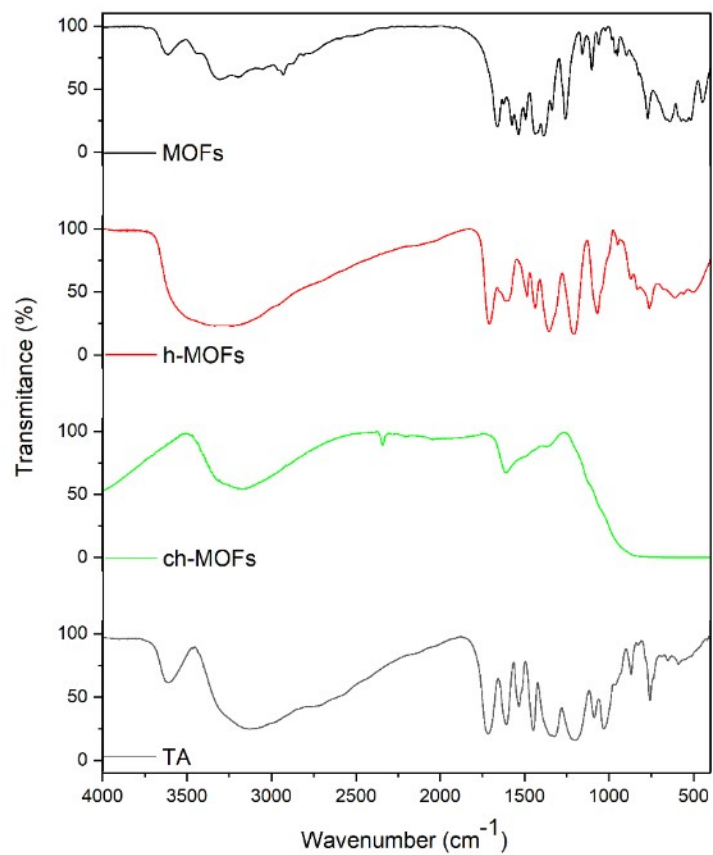

**Fig. S14.** FTIR spectra in the 400–4000 cm<sup>-1</sup> range for the MOF samples and tannic acid (TA).

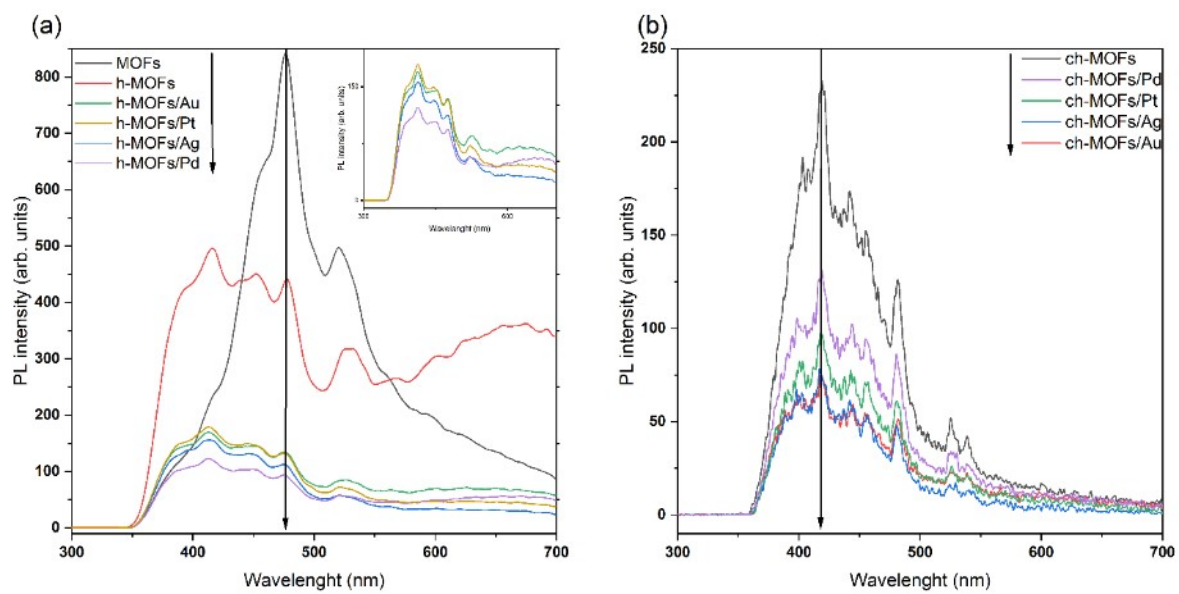

**Fig. S15.** PL spectra of (a) pristine MOFs and (b) hydrolyzed and (c) calcined composites of MOFs.

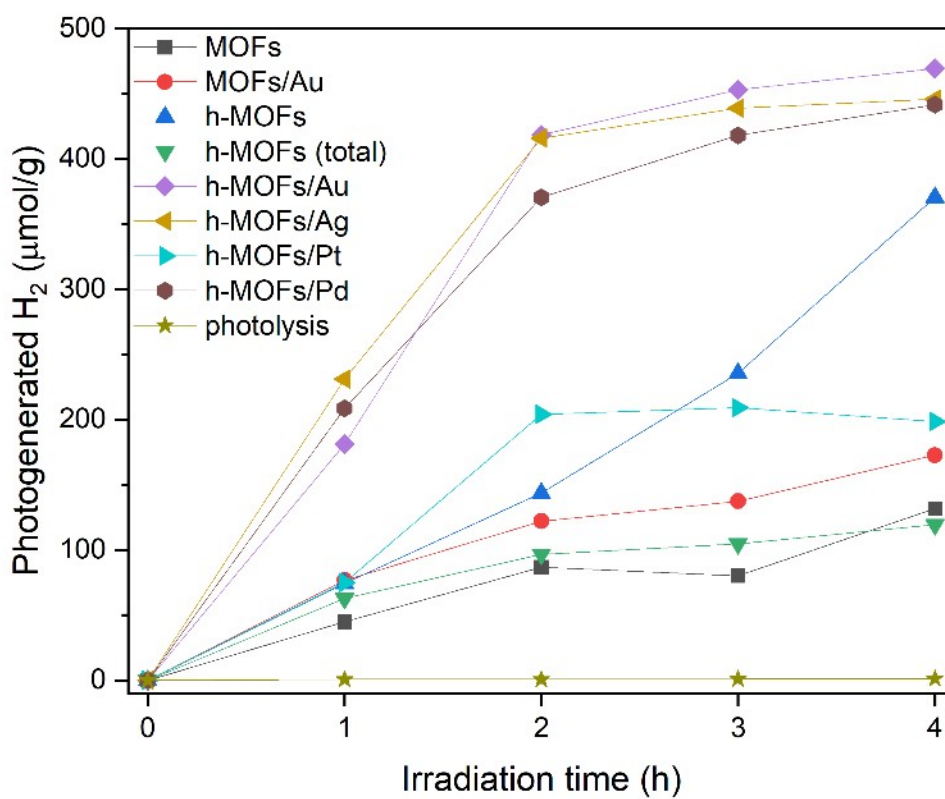

**Fig. S16.** Kinetics of hydrogen photogeneration in the presence of MOFs, h-MOFs, and corresponding noble metal–modified samples under UV-Vis irrigation.

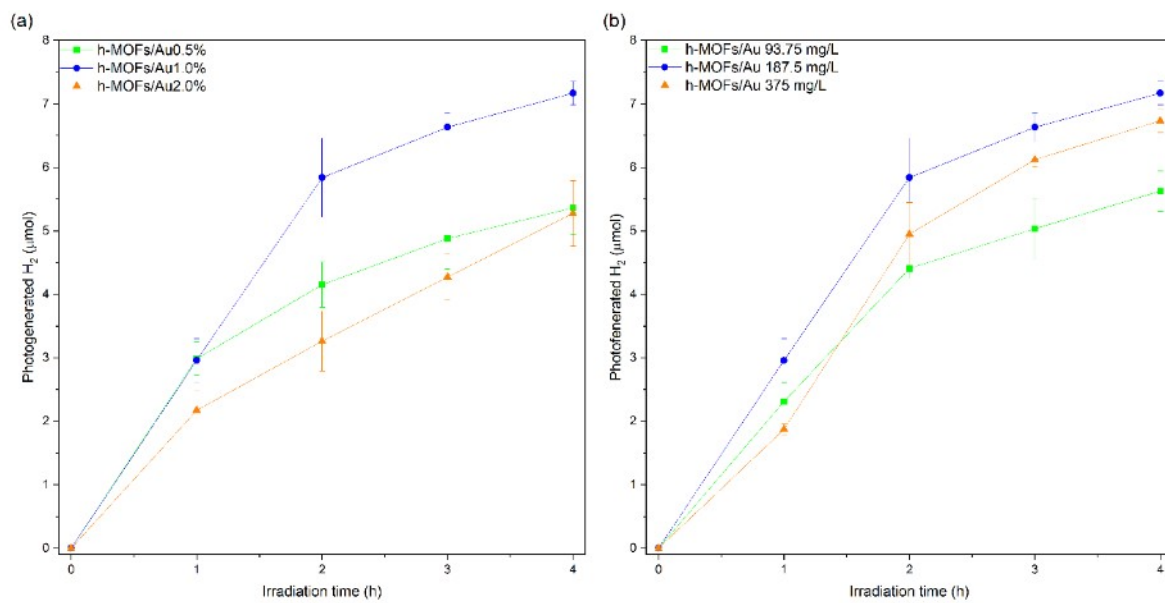

**Fig. S17.** Hydrogen evolution kinetics. (a) h-MOFs modified with different amounts of Au (% wt.) or (b) with different amounts of the h-MOFs/Au photocatalyst.

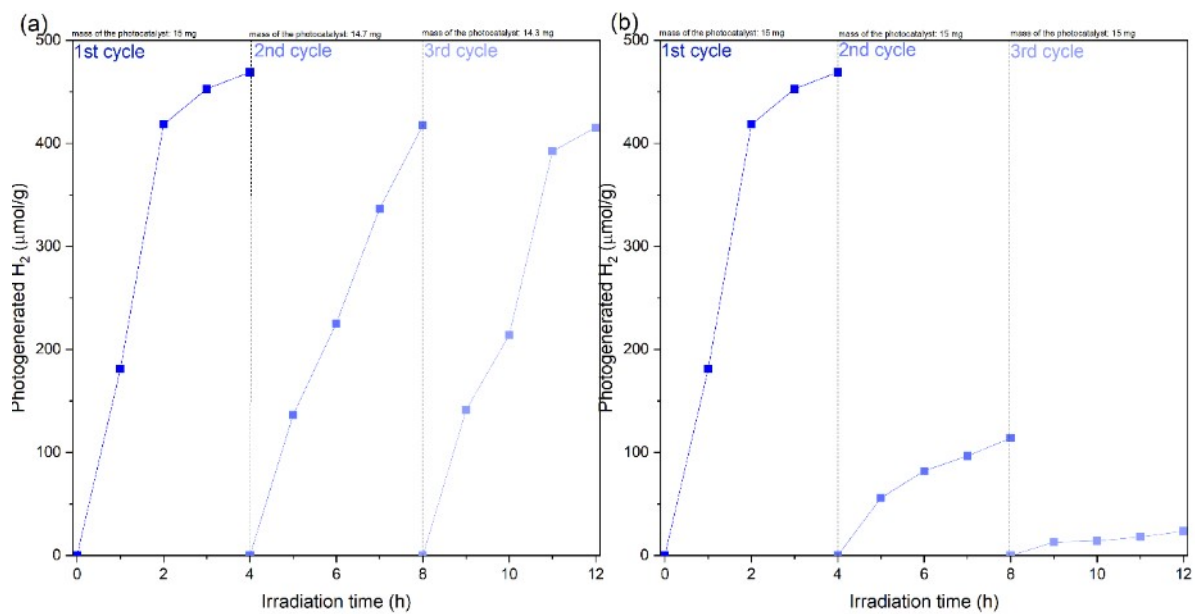

**Fig. S18.** Efficiency of hydrogen photogeneration in the presence of h-MOFs modified with Au under UV-Vis irradiation (a) over 3 cycles with electrolyte replacement, (b) over 3 cycles without electrolyte replacement.



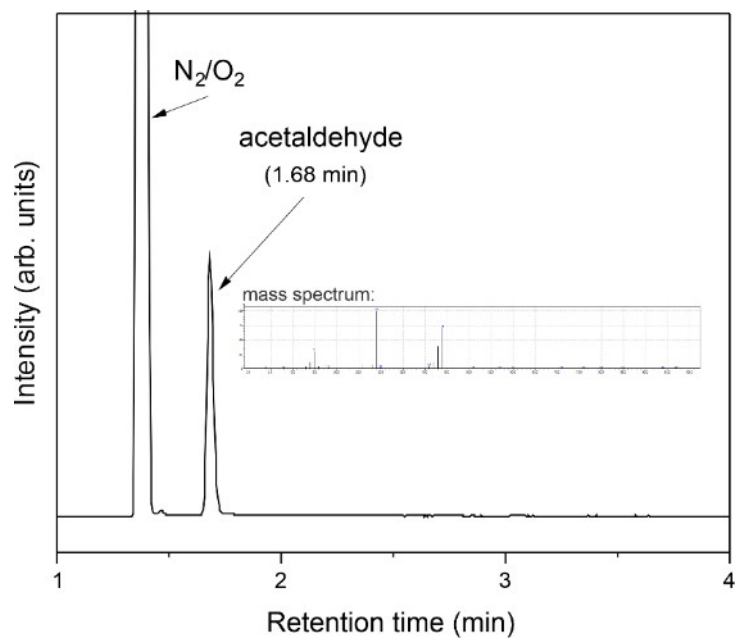

**Fig. S19.** Chromatogram produced by headspace-GC-MS analysis with signal from acetaldehyde highlighted (mass spectrum shown).

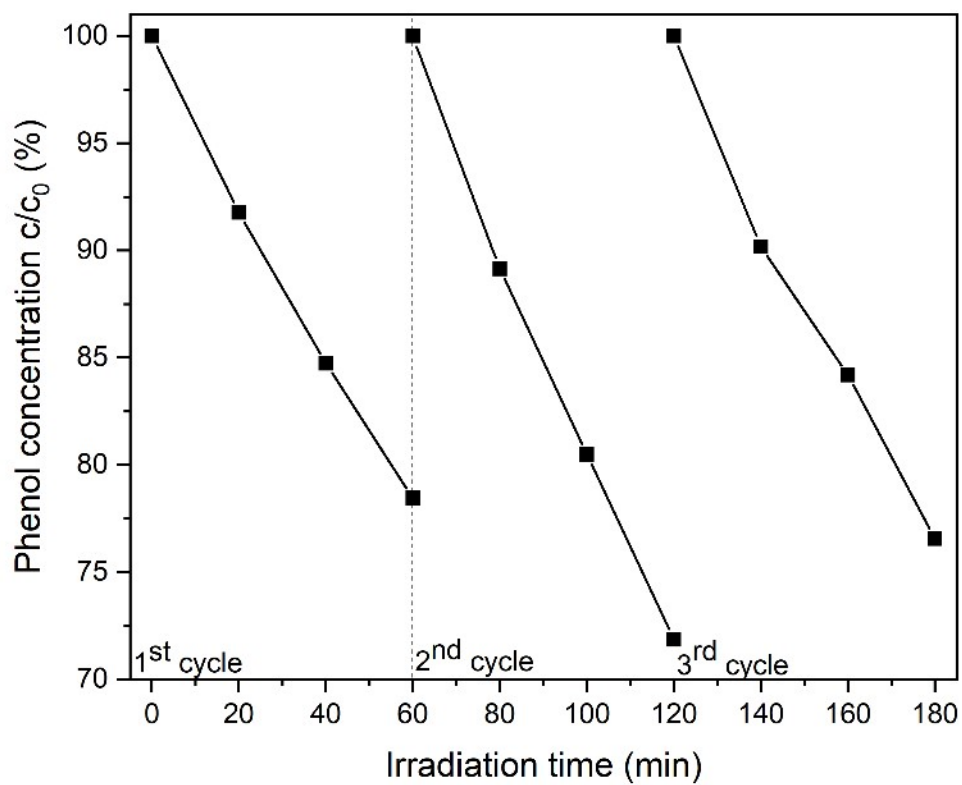

**Fig. S20.** Photostability of ch-MOFs/Au during three cycles of phenol photodegradation under Vis light.

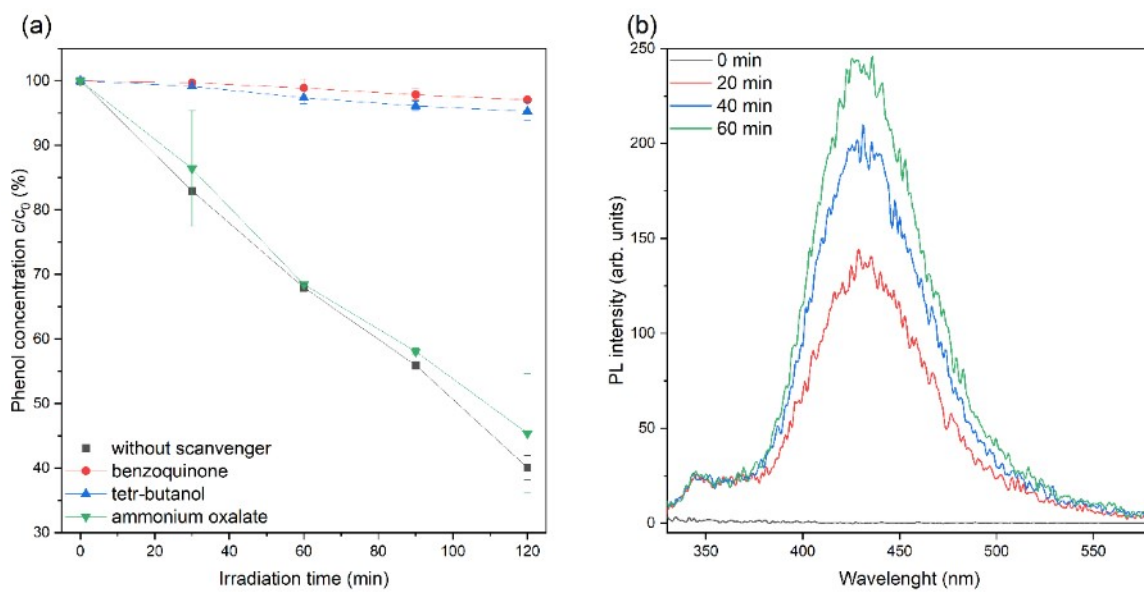

**Fig. S21.** (a) Photodegradation kinetics of phenol using ch-MOFs/Au in the presence of different scavengers under Vis light. (b) PL spectra changes of terephthalic acid solution over 60 min under Vis light irradiation using ch-MOFs/Au.
